# Supplementary material
Source: PubMed Central journal article supplement (PMC7929924)
Supplement: joces-134-253518-s1.pdf [file joces-134-253518-s1.pdf]

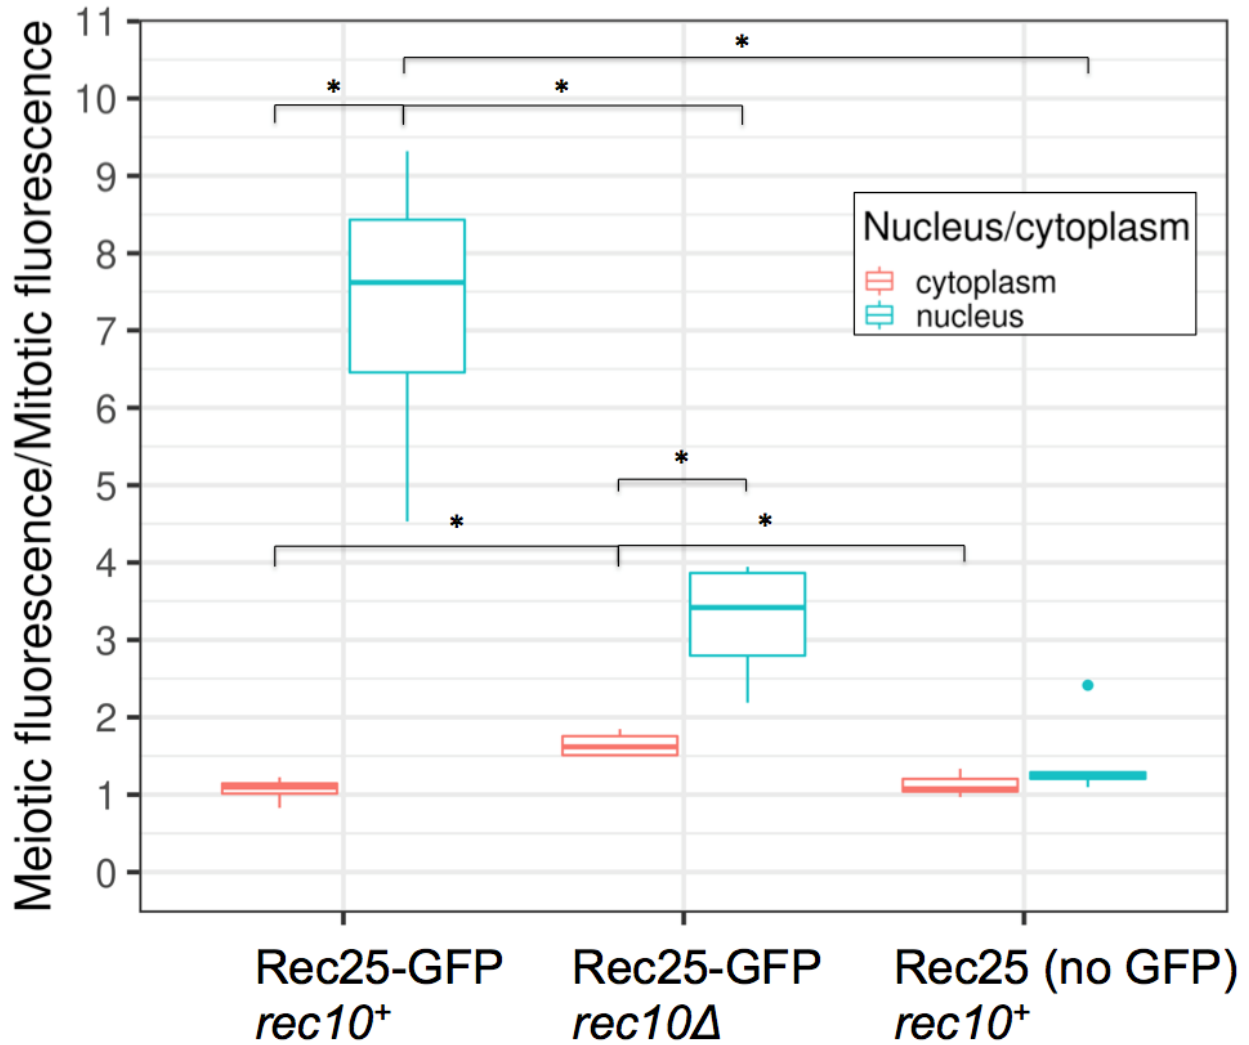

Fig. S1. Rec25 enters the nucleus in *rec10*Δ. Data are quantification of images like those in Fig. 2A showing the ratio of fluorescence in the cytoplasm or in the nucleus, as a ratio of fluorescence in meiotic (horsetail stage) cells to that in mitotic cells. Shown are Rec25-GFP in *rec10*<sup>+</sup> (left data); Rec25-GFP in *rec10*Δ (middle data); and cells with no *GFP* gene (right data). 8 to 27 cells were examined; boxes show the mean (horizontal line) ± 25% (top and bottom of boxes) and 95% limit (ends of vertical lines); one outlier is visible in the right-most data. Asterisks indicate  $p < 0.05$  for the indicated comparisons calculated with a Wilcoxon test corrected for multiple tests. .

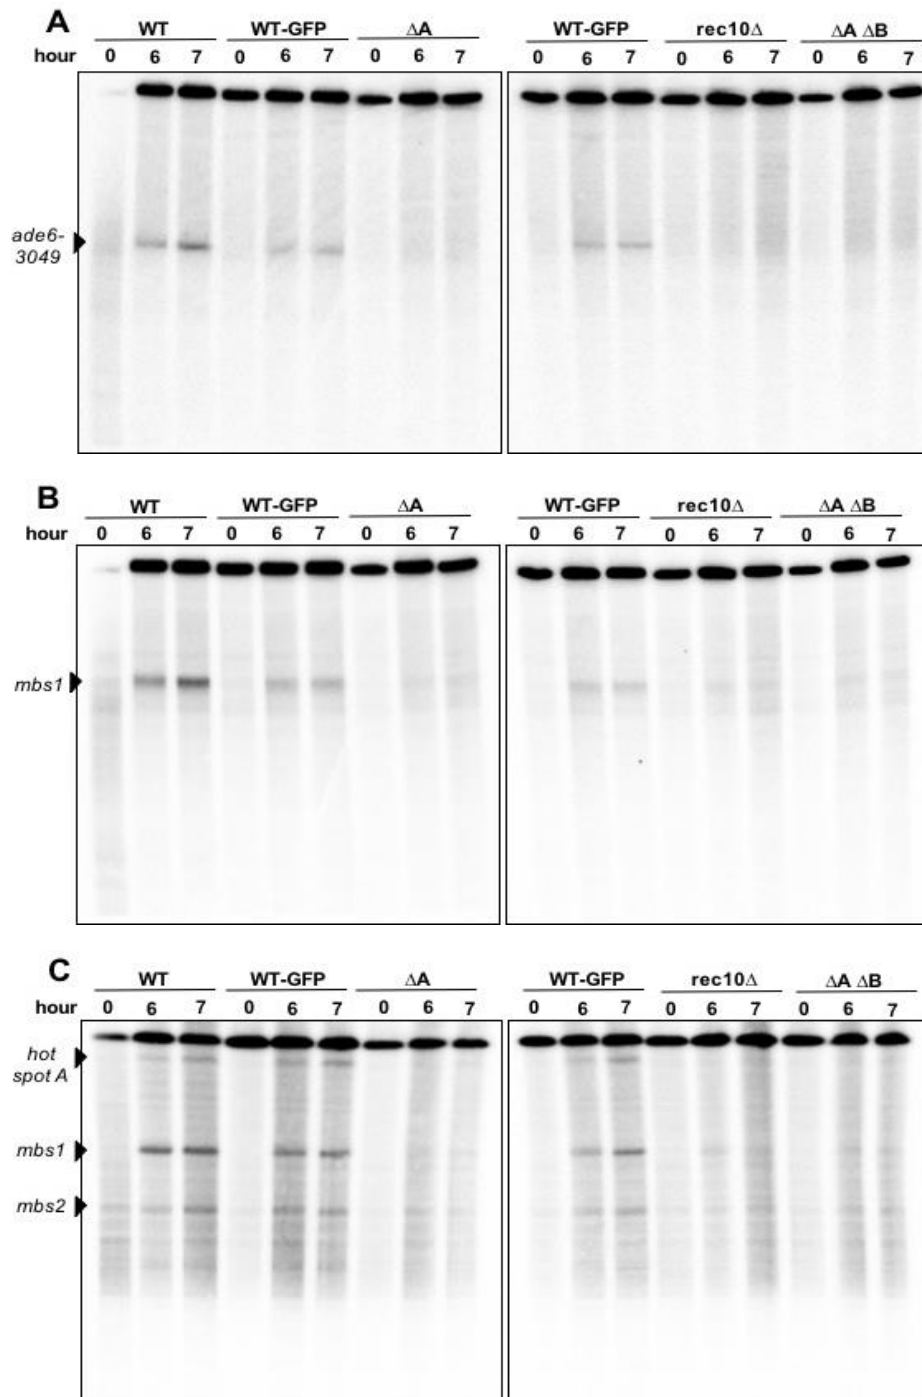

**Figure S2. Rec10-NLS mutants have reduced DSBs at hotspots**

Strains with the indicated *rec10-GFP* alleles (NLS +, ΔA, or ΔA ΔB), wild type (*rec10*<sup>+</sup>), or *rec10Δ* (complete coding-sequence deletion) were induced for meiosis and harvested at the indicated times. DNA was digested with *PmeI* (A and B) or *NotI* (C) and analyzed for DSBs at the indicated hotspots as described in Materials and Methods. The fraction of DNA broken at each hotspot is in Table S1.

**Table S1. DSB frequencies at DSB hotspots are reduced by *rec10-NLS* mutations**

| DNA fragment:<br>DSB hotspot:                   |      | <i>PmeI</i> fragments <sup>a</sup> |                  | <i>NotI</i> fragment J <sup>b</sup> |                  |            |
|-------------------------------------------------|------|------------------------------------|------------------|-------------------------------------|------------------|------------|
|                                                 |      | <i>ade6-3049</i>                   | <i>mbs1</i>      | <i>mbs1</i>                         | <i>mbs2</i>      | A          |
| WT                                              | 0 hr | NA <sup>c</sup>                    | NA               | <0.2                                | 3.2 <sup>d</sup> | <0.2       |
|                                                 | 6 hr | 5.2                                | 6.7              | 9.8                                 | 1.1              | 0.9        |
|                                                 | 7 hr | 7.7                                | 8.4              | 12                                  | 5.3              | 3.4        |
| <i>rec10 nls</i> <sup>+</sup><br>GFP            | 0 hr | <0.2, <0.2, <0.2                   | <0.2, <0.2, <0.2 | <0.2, <0.2                          | <0.2, <0.2       | <0.2, <0.2 |
|                                                 | 6 hr | 2.7, 3.3, 2.5                      | 3.2, 3.3, 3.6    | 4.4, 4.0                            | 2.3, 1.3         | 1.5, 2.2   |
|                                                 | 7 hr | 4.0, 3.7, 4.1                      | 3.8, 3.8, 4.2    | 4.3, 5.7                            | 1.6, 2.0         | 2.9, 3.6   |
| <i>rec10Δ</i>                                   | 0 hr | <0.2                               | <0.2             | <0.2                                | <0.2             | 0.3        |
|                                                 | 6 hr | <0.2                               | 1.0              | 0.9                                 | <0.2             | <0.2       |
|                                                 | 7 hr | <0.2                               | 0.6              | <0.2                                | <0.2             | 1.5        |
| <i>rec10 nls</i><br><i>ΔA-GFP</i>               | 0 hr | <0.2, <0.2                         | <0.2, <0.2       | <0.2                                | <0.2             | <0.2       |
|                                                 | 6 hr | <0.2, 0.6                          | 1.1, 1.0         | <0.2                                | 0.9              | 0.4        |
|                                                 | 7 hr | <0.2, 0.8                          | 0.8, 0.7         | <0.2                                | <0.2             | 1.0        |
| <i>rec10 nls</i><br><i>ΔA ΔB-</i><br><i>GFP</i> | 0 hr | <0.2, <0.2                         | <0.2, <0.2       | <0.2                                | <0.2             | <0.2       |
|                                                 | 6 hr | <0.2, <0.2                         | 0.8, 0.4         | 0.6                                 | 0.8              | 0.3        |
|                                                 | 7 hr | <0.2, <0.2                         | 0.6, 0.6         | 0.4                                 | 1.0              | 0.6        |

DSBs were assayed at the indicated times after induction of strains with the indicated genotypes (see Table S2), as described in Materials and Methods. Where indicated, multiple gels from one induced culture for each strain were analyzed. The lower limit of detection was estimated to be 0.2%.

<sup>a</sup> DNA was digested with *PmeI*. The 74 kb fragment was analyzed for DSBs at *ade6-3049* on Chr. 3, and the 64 kb fragment was analyzed for DSBs at *mbs1* on Chr. 1.

<sup>b</sup> DNA was digested with *NotI* and the 501 kb fragment J was analyzed for *mbs1*, *mbs2*, and a hotspot, here named A, close to the right end of the fragment.

<sup>c</sup> NA, not available. The agarose plug containing the cells, and thus DNA, for this *PmeI* analysis was degraded (see Figure S2A and B).

<sup>d</sup> This value is questionable, because the band is one of several unexpectedly observed in this 0 hr lane (Figure S2C).

**Table S2. *S. pombe* strains<sup>a</sup>**

| Strain number | Genotype <sup>b</sup>                                                  | Use                                                                                  |
|---------------|------------------------------------------------------------------------|--------------------------------------------------------------------------------------|
| GP50          | <i>h<sup>90</sup></i>                                                  | Microscopy (background control)                                                      |
| GP935         | <i>h- ade6-52 ura4-D18</i>                                             | Recombination assay, chromosomal <i>rec10</i>                                        |
| GP4414        | <i>h+ ade6-M26 arg1-14 rec10-175::kanMX6</i>                           | Recombination assay, chromosomal <i>rec10</i>                                        |
| GP4625        | <i>h- ade6-52 rec10-175::kanMX6</i>                                    | Recombination assay, chromosomal <i>rec10::GFP</i>                                   |
| GP4914        | <i>h+ ura4-D18 ade6-M26 arg1-14</i>                                    | Recombination assay, chromosomal <i>rec10::GFP</i> ; construction of GP9964 – GP9973 |
| GP6994        | <i>h- rec10-175::kanMX6 ura4-D18 ade6-52</i>                           | Recombination assay, plasmid-borne <i>rec10</i>                                      |
| GP7301        | <i>h- ade6-52 ura4-D18 rec10-260::ura4<sup>+</sup></i>                 | Construction of GP9978 – GP9983                                                      |
| GP8762        | <i>h<sup>90</sup> rec10-203::GFP-kanMX6</i>                            | Construction of GP9836                                                               |
| GP8766        | <i>h<sup>90</sup> rec25-204::GFP-kanMX6</i>                            | Construction of GP9745                                                               |
| GP8819        | <i>h<sup>90</sup> rec27-205-GFP::kanMX6</i>                            | Microscopy, Rec27 localization                                                       |
| GP8829        | <i>h<sup>90</sup> mug20-GFP::kanMX6</i>                                | Microscopy, Mug20 localization                                                       |
| GP9745        | <i>h<sup>90</sup> rec25-303::GFP-hphMX6</i>                            | Microscopy, Rec25 localization; construction of GP9989 – GP9995,                     |
| GP9747        | <i>h<sup>90</sup> rec10-301::GFP-natMX6</i>                            | Microscopy, Rec10 localization                                                       |
| GP9775        | <i>h+ rec10-175::kanMX6 ura4-D18 ade6-M26 arg1-14</i>                  | Recombination assay, plasmid-borne <i>rec10</i>                                      |
| GP9806        | <i>h<sup>90</sup> rec10-175::kanMX6 rec25-303::GFP-hphMX6 ura4-294</i> | Microscopy, Rec25 localization, plasmid-borne <i>rec10</i>                           |
| GP9823        | <i>h- rec25-220::tdTomato-hphMX6</i>                                   | Construction of GP9926 – GP9944                                                      |
| GP9836        | <i>h<sup>90</sup> rec10-301::GFP-natMX6 ura4-D18</i>                   | Construction of GP9845                                                               |
| GP9845        | <i>h<sup>90</sup> rec10-306::ura4<sup>+</sup>-GFP-natMX6 ura4-D18</i>  | Construction of GP9876 – GP9889                                                      |
| GP9852        | <i>h+ ade6-M26 ura4-D18 arg1-14 rec10-301::GFP-natMX6</i>              | Recombination assay, chromosomal <i>rec10::GFP</i>                                   |
| GP9859        | <i>h- rec10-301::GFP-natMX6 pat1-as1(L95G)::kanMX6</i>                 | Western blot, Rec10 abundance                                                        |
| GP9860        | <i>h- pat1-as1(L95G)::kanMX6</i>                                       | Construction of GP9950 – GP9959                                                      |
| GP9901        | <i>h- pat1-as1(L95G)::kanMX6 ade6-3049 rad50S</i>                      | Southern blot, DSB abundance                                                         |

|        |                                                                                    |                                                          |
|--------|------------------------------------------------------------------------------------|----------------------------------------------------------|
| GP9998 | <i>h<sup>-</sup> pat1-as1(L95G)::kanMX6 ade6-3049 rad50S rec10-301-GFP::natMX6</i> | Southern blot, DSB abundance                             |
| GP9999 | <i>h<sup>-</sup> pat1-as1(L95G)::kanMX6 ade6-3049 rad50S rec10-289-GFP::natMX6</i> | Southern blot, DSB abundance                             |
| GR1    | <i>h<sup>-</sup> pat1-as1(L95G)::kanMX6 ade6-3049 rad50S rec10-175::kanMX6</i>     | Southern blot, DSB abundance                             |
| GR2    | <i>h<sup>-</sup> pat1-as1(L95G)::kanMX6 ade6-3049 rad50S rec10-296-GFP::natMX6</i> | Southern blot, DSB abundance                             |
| GR9    | <i>h<sup>90</sup> rec27-205-GFP::kanMX6 rec10-296</i>                              | Microscopy, Rec27 localization, chromosomal <i>rec10</i> |
| GR10   | <i>h<sup>90</sup> mug20-GFP::kanMX6 rec10-296</i>                                  | Microscopy, Mug20 localization, chromosomal <i>rec10</i> |

<sup>a</sup> Additional strains are in Table S5.

<sup>b</sup> Strains were constructed by standard matings (Smith, 2009) or as described in Methods. Genealogies are available upon request. Sources of alleles, other than commonly used auxotrophies and *mat*, are the following: *mug20-GFP::kanMX6* (Estreicher et al., 2012); *pat1-as1(L95G)::kanMX6* (Guerra-Moreno et al., 2012); *rad50S* (Farah et al., 2002); *rec10-175::kanMX6* (Ellermeier and Smith, 2005); *rec10-203::GFP-kanMX6* (Fowler et al., 2013); *rec10-260::ura4<sup>+</sup>* (Ma et al., 2017); *rec10-301::GFP-natMX6* (Materials and Methods); *rec10-306::ura4<sup>+</sup>-GFP-natMX6* (Materials and Methods); *rec25-204::GFP-kanMX6* (Davis et al., 2008); *rec25-220::tdTomato-hphMX6* (Fowler et al., 2013); *rec25-303::GFP-hphMX6* (Materials and Methods); *rec27-205-GFP::kanMX6* (Davis et al., 2008).

**Table S3. Plasmids<sup>a</sup>**

| Plasmid              | Genotype                                           | Ref. or origin         |
|----------------------|----------------------------------------------------|------------------------|
| pFY20                | <i>ura4<sup>+</sup> ars1 stb amp</i>               | (Li et al., 1997)      |
| pYL176               | <i>rec10<sup>+</sup> URA3<sup>b</sup> ars1 amp</i> | (Lin and Smith, 1995)  |
| pFA6a- <i>natMX6</i> | <i>natMX6</i>                                      | (Hentges et al., 2005) |
| pFA6a- <i>hphMX6</i> | <i>hphMX6</i>                                      | (Hentges et al., 2005) |

<sup>a</sup> Additional plasmids are listed in Table S4.

<sup>b</sup> *S. cerevisiae URA3*, which complements *S. pombe ura4* mutations.

**Table S4. Oligonucleotides for *rec10* NLS mutant constructions**

| Oligo number | Nucleotide sequence (5' → 3')                                                                                             |
|--------------|---------------------------------------------------------------------------------------------------------------------------|
| OL4134       | AGATGGAAAGTTTGCAAATCGACACAAAATCTTTAAAACCTGATACTG                                                                          |
| OL4135       | CAGTATCAGGTTTTAAAGATTTTTGTGTGCGATTTTGCAAACCTTCCATCT                                                                       |
| OL4136       | CTGAAAATCAAGAATCTTCGGTGGCGAAATCCAATGTTAATTTGCA                                                                            |
| OL4137       | TGCAAATTAACATTGGATTTGCCACCGAAGATTCTTGATTTTCAG                                                                             |
| OL4140       | GCTGCACAAAATCTTTAAAACCTGATAC                                                                                              |
| OL4141       | TGCAGCTGTGCGATTTTGCAAACCTTC                                                                                               |
| OL4142       | GCTGCAGCGAAATCCAATGTTAATTTG                                                                                               |
| OL4143       | TGCAGCCACCGAAGATTCTTGATTTTC                                                                                               |
| OL4154       | CACTTCCAAGCAAGCATCCCAG (used for PCR amplification of NLS region)                                                         |
| OL4147       | CCTGTACTCAAGTTCCTGGCGA (used for PCR amplification of NLS region)                                                         |
| OL4155       | GACAAGAGTGTGTGCGACGATG (used for sequencing PCR products)                                                                 |
| OL1780       | GTAACCGTCACTTATCGATGG (used for PCR analysis of <i>rec10<sup>+</sup></i> and <i>rec10-306</i> )                           |
| OL1781       | AGCATGGACAGTATTGGCAAC (used for PCR analysis of <i>rec10<sup>+</sup></i> )                                                |
| OL2124       | ATGCTCCTACAACATTACCAC (used for PCR analysis of <i>rec10-306</i> )                                                        |
| OL4278       | CACGCACAATCAACTGAAAC ( <i>rec10</i> left forward primer to make <i>rec10-306</i> )                                        |
| OL4279       | TTTCGTCAATATCACAAGCTCGGCAGTTCAATTTCTTGC ( <i>rec10</i> left <i>ura4</i> flank reverse primer to make <i>rec10-306</i> )   |
| OL4280       | GTGGGATTTGTAGCTAAGCTCCTACGATAGCAAACATTGC ( <i>rec10</i> right <i>ura4</i> flank forward primer to make <i>rec10-306</i> ) |
| OL4281       | TCCTGTACTCAAGTTCCTGG ( <i>rec10</i> right reverse primer to make <i>rec10-306</i> )                                       |
| OL4282       | GCAAGAAATTGAACTGCCGAGCTTGTGATATTGACGAAA ( <i>rec10::ura4<sup>+</sup></i> forward primer to make <i>rec10-306</i> )        |
| OL4283       | GCAATGTTTGCTATCGTAGGAGCTTAGCTACAAATCCCAC ( <i>rec10::ura4<sup>+</sup></i> reverse primer to make <i>rec10-306</i> )       |

**Table S5. *rec10* nuclear localization signal (NLS) mutants**

| <i>rec10</i> allele | Alternate designation | Amino acid sequence <sup>a</sup><br>Site A Site B | Oligos; plasmid recipient   | Plasmid isolate | Chromosomal isolate |        |        |        |        |        |
|---------------------|-----------------------|---------------------------------------------------|-----------------------------|-----------------|---------------------|--------|--------|--------|--------|--------|
|                     |                       |                                                   |                             |                 | b                   | c      | d      | e      | f      | g      |
| 301                 | +                     | <b>KRKK KNKK</b>                                  |                             |                 | GP9836              |        | GP9747 |        | GP9859 | GP9582 |
| 289                 | ΔA                    | ΔΔΔΔ ----                                         | OL4134,<br>OL4135<br>pYL176 | pMW2            | GP9876              | GP9982 | GP9926 | GP9992 | GP9950 | GP9964 |
| 290                 | ΔB                    | ---- ΔΔΔΔ                                         | OL4136,<br>OL4137<br>pYL176 | pMW3            | GP9877              | GP9978 | GP9928 | GP9989 | GP9951 | GP9965 |
| 296                 | ΔA ΔB                 | ΔΔΔΔ ΔΔΔΔ                                         | OL4134,<br>OL4135<br>pMW3   | pMW9            | GP9886              | GP9983 | GP9938 | GP9993 | GP9956 | GP9970 |
| 292                 | AlaA                  | AAAA ----                                         | OL4140,<br>OL4141<br>pYL176 | pMW5            | GP9878              | GP9979 | GP9930 | GP9990 | GP9952 | GP9966 |
| 293                 | AlaB                  | ---- AAAA                                         | OL4142,<br>OL4143<br>pYL176 | pMW6            | GP9879              | GP9980 | GP9932 | GP9995 | GP9953 | GP9967 |
| 299                 | AlaA<br>AlaB          | AAAA AAAA                                         | OL4140,<br>OL4141<br>pMW6   | pMW12           | GP9889              | GP9981 | GP9944 | GP9991 | GP9959 | GP9973 |

<sup>a</sup> Rec10 amino acids from 497 – 519 (**KRKKQKSLKPDTENQESSVKNKK**). The wild-type sequence is given for the + allele (*rec10*<sup>+</sup> on the plasmid and *rec10*<sup>+</sup> or *rec10-301::GFP-natMX6* on the chromosome). For other alleles “-” indicates the amino acid is that of wild type, and “Δ” or “A” indicates the amino acid is deleted or changed to Ala, respectively.

<sup>b</sup> Strains with the *rec10-NLS-GFP* fusion alleles, used to make strains in column d. Strains other than GP9836 were derived from 5-fluoro-orotic acid-resistant (FOA<sup>R</sup>) transformants of strain GP9845.

<sup>c</sup> Strains with the *rec10-NLS* alleles without GFP fusion, used to make strains in column e and for recombination assays. Strains were derived from FOA<sup>R</sup> transformants of strain GP7301.

<sup>d</sup> Strains with the *rec10-NLS-GFP* fusion alleles, used for microscopy of Rec10-GFP localization. Strains were derived from crosses of GP9823 with strains in column b.

<sup>e</sup> Strains with the *rec10-NLS* alleles without GFP fusion, used for microscopy of Rec25-GFP localization. Strains were derived from crosses of GP9745 with strains in column c.

<sup>f</sup> Strains with the *rec10-NLS-GFP* fusion alleles, used to assay Rec10 abundance by Western blot analyses. Strains were derived from crosses of GP9860 with strains in column b.

<sup>g</sup> Strains with the *rec10-NLS-GFP* alleles, used for recombination assays. Strains were derived from crosses of GP4914 with strains in column b.

## Supplemental references

- Davis, L., Rozalén, A.E., Moreno, S., Smith, G.R., and Martin-Castellanos, C. (2008). Rec25 and Rec27, novel components of meiotic linear elements, link cohesin to DNA breakage and recombination in fission yeast. *Current Biology* 18, 849-854.
- Ellermeier, C., and Smith, G.R. (2005). Cohesins are required for meiotic DNA breakage and recombination in *Schizosaccharomyces pombe*. *Proc. natl. Acad. Sci. USA* 102, 10952-10957.
- Estreicher, A., A. Lorenz, and J. Loidl. 2012. Mug20, a novel protein associated with linear elements in fission yeast meiosis. *Current Genetics*. 58:119-127.
- Farah, J.A., Hartsuiker, E., Mizuno, K.-I., Ohta, K., and Smith, G.R. (2002). A 160-bp palindrome is a Rad50•Rad32-dependent mitotic recombination hotspot in *Schizosaccharomyces pombe*. *Genetics* 161, 461-468.
- Fowler, K.R., Gutiérrez-Velasco, S., Martín-Castellanos, C., and Smith, G.R. (2013). Protein determinants of meiotic DNA break hotspots. *Mol. Cell* 49, 983-996.
- Guerra-Moreno, A., Alves-Rodrigues, I., Hidalgo, E., and Ayte, J. (2012). Chemical genetic induction of meiosis in *Schizosaccharomyces pombe*. *Cell Cycle* 11, 1621-1625.
- Hentges, P., Van Driessche, B., Tafforeau, L., Vandenhoute, J., and Carr, A.M. (2005). Three novel antibiotic marker cassettes for gene disruption and marker switching in *Schizosaccharomyces pombe*. *Yeast* 22, 1013-1019.
- Li, Y.F., Numata, M., Wahls, W.P., and Smith, G.R. (1997). Region-specific meiotic recombination in *S. pombe*: the *rec11* gene. *Molecular Microbiology* 23, 869-878.
- Lin, Y., and Smith, G.R. (1995). Molecular cloning of the meiosis-induced *rec10* gene of *Schizosaccharomyces pombe*. *Current Genetics* 27, 440-446.
- Ma, L., Fowler, K.R., Martin-Castellanos, C., and Smith, G.R. (2017). Functional organization of protein determinants of meiotic DNA break hotspots. *Sci Rep* 7, 1393.
- Smith, G.R. (2009). Genetic analysis of meiotic recombination in *Schizosaccharomyces pombe*. In *Meiosis*, S. Keeney, ed. (Totowa, NJ: Humana Press), pp. 65-76.
